# Supplementary material for: Extended anticoagulation after venous thromboembolism: should it be done?
Source: PubMed Central journal article supplement — Ther Adv Respir Dis. 2019 Sep 27;13:1753466619878556. doi: 10.1177/1753466619878556 (PMC6767720; doi:10.1177/1753466619878556), 2019-09-27
Supplement: Reviewer_1_v.1.pdf [file Reviewer_1_v.1.pdf]

Reviewer 1 v.1

#### Comments to the Author

Solidoro et al. evaluated the occurrence and outcome of CMV infections among LT recipients receiving a combined universal CMV prophylaxis for 12 months post-transplant. Results showed that D+/R- population had more CMV viremia episodes and less viremia-free days. Authors concluded that D+/R- group was high-risk population for CMV viremia. This study is interesting, however some concerns included.

1. Did authors emphasize the efficacy of ELISPOT to investigate the CMV infections?
2. Discussion is too long. Authors must discuss concisely.
3. Non-standard division data must be expressed as median with interquartile range.
4. Authors should show the results of ELISPOT in figure or table.
5. Why was CMV pneumonia higher incidence in D+/R+ group than that in D+/R-?
6. What should the clinicians do in D+/R- group pre or post LT?
